# Supplementary material for: The opportunity cost of animal based diets exceeds all food losses
Source: PubMed Central journal article supplement — Proc Natl Acad Sci U S A. 2018 Mar 26;115(15):3804–9. doi: 10.1073/pnas.1713820115 (PMC5899434; doi:10.1073/pnas.1713820115), 2018-03-26
Supplement: pnas.201713820SI.pdf [file pnas.201713820SI.pdf]

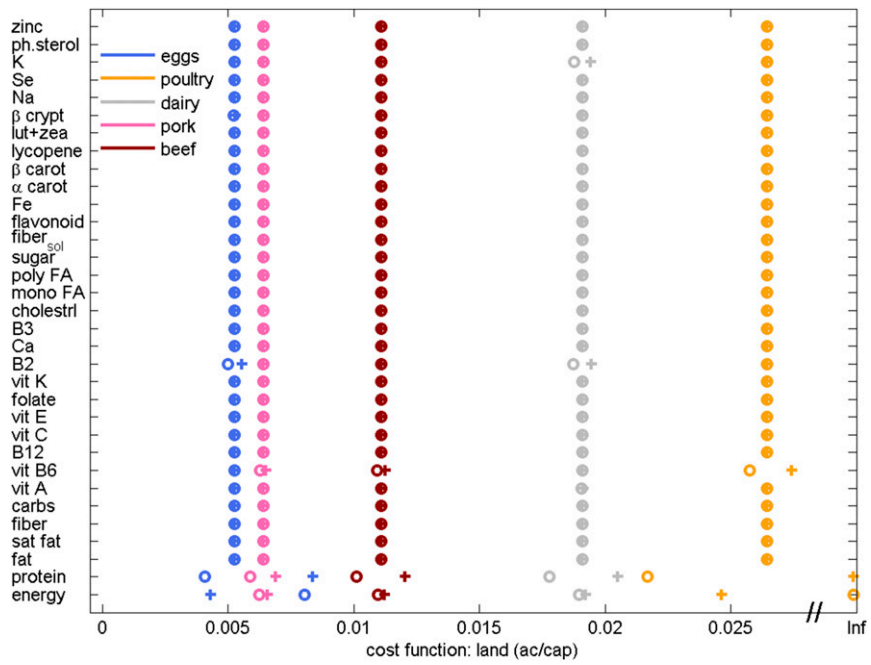

**Fig. S3.** Sensitivity analysis of the optimization scheme in which each nutrient of the replaced diet is increased (plus sign) or decreased (open circle) by 10% individually (with the other components unchanged). In cases where no solutions were obtained, results appear as "Inf."

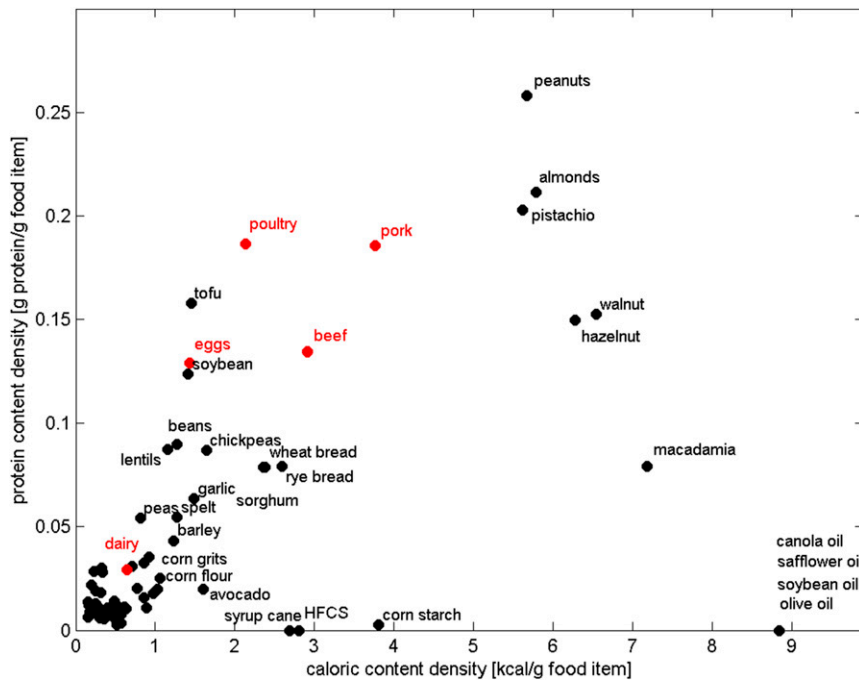

**Fig. S4.** Protein and caloric values per 1 g for each of the plant and animal food items used in our analysis.



## Other Supporting Information Files

[Dataset S1 \(XLSX\)](#)

[Dataset S2 \(XLSX\)](#)

[Dataset S3 \(XLS\)](#)

[Dataset S4 \(XLSX\)](#)
